# Supplementary material for: Behaviour-change intervention in a multicentre, randomised, placebo-controlled COPD study: methodological considerations and implementation
Source: PubMed Central journal article supplement — BMJ Open. 2016 Apr 4;6(4):e010109. doi: 10.1136/bmjopen-2015-010109 (PMC4823464; doi:10.1136/bmjopen-2015-010109), 2016-04-04
Supplement: bmjopen-2015-010109supp_appendix1.pdf [file bmjopen-2015-010109supp_appendix1.pdf]

|                                                                                                    |                                                                                                                |                                                                  |                       |
|----------------------------------------------------------------------------------------------------|----------------------------------------------------------------------------------------------------------------|------------------------------------------------------------------|-----------------------|
| <b>Patient ID:</b>                                                                                 |                                                                                                                | <b>Case Manager ID:</b>                                          |                       |
| <b>Group Session 4</b>                                                                             |                                                                                                                | <input type="checkbox"/> <b>Patient Questionnaires completed</b> | <b>Date:</b><br>_____ |
| • How much time did you spend being physically active over the last week?                          | _____ minutes per week                                                                                         |                                                                  |                       |
| • What is the average number of steps that you walked per day over the last week?                  | _____ average number of steps per day                                                                          |                                                                  |                       |
| • What is your goal in terms of average number of steps per day from today until the next session? | _____ average number of steps per day                                                                          |                                                                  |                       |
| <b>Individual Follow-up</b>                                                                        |                                                                                                                | <input type="checkbox"/> <b>Patient Questionnaires completed</b> | <b>Date:</b><br>_____ |
| • How much time did you spend being physically active over the last week?                          | _____ minutes per week                                                                                         |                                                                  |                       |
| • What is the average number of steps that you walked per day over the last week?                  | _____ average number of steps per day                                                                          |                                                                  |                       |
| • To what degree have you reached your ultimate physical activity goal?                            | Not achieved                                                                                                   | Partially achieved                                               | Achieved fully        |
| • If not achieved or only partially, why?                                                          | _____                                                                                                          |                                                                  |                       |
| • Action plan and recommendations                                                                  | _____                                                                                                          |                                                                  |                       |
| <b>Date</b>                                                                                        | <b>Notes and general comments (e.g. specific follow-ups to be done with patient, homework, contract, etc.)</b> |                                                                  |                       |
|                                                                                                    |                                                                                                                |                                                                  |                       |
|                                                                                                    |                                                                                                                |                                                                  |                       |
|                                                                                                    |                                                                                                                |                                                                  |                       |
|                                                                                                    |                                                                                                                |                                                                  |                       |
|                                                                                                    |                                                                                                                |                                                                  |                       |
|                                                                                                    |                                                                                                                |                                                                  |                       |
|                                                                                                    |                                                                                                                |                                                                  |                       |
|                                                                                                    |                                                                                                                |                                                                  |                       |
|                                                                                                    |                                                                                                                |                                                                  |                       |
|                                                                                                    |                                                                                                                |                                                                  |                       |

Site Case Manager signature: \_\_\_\_\_
