# Supplementary material for: Behaviour-change intervention in a multicentre, randomised, placebo-controlled COPD study: methodological considerations and implementation
Source: PubMed Central journal article supplement — BMJ Open. 2016 Apr 4;6(4):e010109. doi: 10.1136/bmjopen-2015-010109 (PMC4823464; doi:10.1136/bmjopen-2015-010109), 2016-04-04
Supplement: bmjopen-2015-010109supp_appendix2.pdf [file bmjopen-2015-010109supp_appendix2.pdf]

## SESSION EVALUATION BY THE SITE CASE MANAGER

### INDIVIDUAL PRE-SESSION

|                                                                                                              |                                                                                                              |                                                                                                                                                                                                                                                                                                                                                 |                    |
|--------------------------------------------------------------------------------------------------------------|--------------------------------------------------------------------------------------------------------------|-------------------------------------------------------------------------------------------------------------------------------------------------------------------------------------------------------------------------------------------------------------------------------------------------------------------------------------------------|--------------------|
| <b>Site Case Manager ID:</b>                                                                                 |                                                                                                              | <b>Session Date:</b>                                                                                                                                                                                                                                                                                                                            |                    |
| <b>Audio file ID:</b>                                                                                        |                                                                                                              | <b>Audio file given to Study Coordinator</b>                                                                                                                                                                                                                                                                                                    | <b>Date:</b> _____ |
| <b>Participating patient ID:</b>                                                                             |                                                                                                              | <b>Patient guide provided?</b> <input type="checkbox"/>                                                                                                                                                                                                                                                                                         |                    |
| <b>Checkmarks</b>                                                                                            | <b>Indicate which topics were covered</b>                                                                    |                                                                                                                                                                                                                                                                                                                                                 |                    |
| <b>yes</b>                                                                                                   | <b>no</b>                                                                                                    |                                                                                                                                                                                                                                                                                                                                                 |                    |
| <input type="checkbox"/>                                                                                     | <input type="checkbox"/>                                                                                     | 1. Identify current level of autonomy, physical activity and functional limitations                                                                                                                                                                                                                                                             |                    |
| <input type="checkbox"/><br><input type="checkbox"/><br><input type="checkbox"/><br><input type="checkbox"/> | <input type="checkbox"/><br><input type="checkbox"/><br><input type="checkbox"/><br><input type="checkbox"/> | 2. Complete with the patient the following questionnaires:<br>2.1. Physical Activity Outcome Expectancies<br>2.2. Perceived competence Scale (PCS) for physical activity<br>2.3. Treatment self-regulation questionnaire (TSRQ) for Physical Activity                                                                                           |                    |
| <input type="checkbox"/>                                                                                     | <input type="checkbox"/>                                                                                     | 3. Using the Visual Analogue Scale, determine patient's stage of change with respect to engaging in Physical Activity                                                                                                                                                                                                                           |                    |
| <input type="checkbox"/><br><input type="checkbox"/><br><input type="checkbox"/>                             | <input type="checkbox"/><br><input type="checkbox"/><br><input type="checkbox"/>                             | 4. Determine patient's level of motivation or reasons for engaging in Physical Activity (10-point scale).<br>4.1. Help the patient to determine his ultimate goal in terms of Physical Activity<br>4.2. Determine patient's level of self-efficacy in regard to beginning OR maintaining (depending on their stage of change) Physical Activity |                    |
| <input type="checkbox"/>                                                                                     | <input type="checkbox"/>                                                                                     | 5. Identify perceived barriers according to patient's self-evaluation. Find solutions together.                                                                                                                                                                                                                                                 |                    |
| <input type="checkbox"/><br><input type="checkbox"/>                                                         | <input type="checkbox"/><br><input type="checkbox"/>                                                         | 6.1. Teach or review the proper use of the pedometer. Ask patient to explain, in his own words, how he plans to use the pedometer (goal in steps per day, progression).<br>6.2. Give constructive feedback and reinforcement on the use of the pedometer. Find solutions together.                                                              |                    |
| <b>If some topics were not covered, or only partially:</b>                                                   |                                                                                                              | <input type="checkbox"/> Patient factors (1) <input type="checkbox"/> Program factors (2) <input type="checkbox"/> Case Manager factors (3)                                                                                                                                                                                                     |                    |
| - identify & explain reasons                                                                                 |                                                                                                              |                                                                                                                                                                                                                                                                                                                                                 |                    |
| - describe plan for wrap-up                                                                                  |                                                                                                              |                                                                                                                                                                                                                                                                                                                                                 |                    |
| <b>Notes and general comments:</b>                                                                           |                                                                                                              |                                                                                                                                                                                                                                                                                                                                                 |                    |

**Notes:** (1) e.g. patient left, sick; (2) e.g. too much content, time constraints; (3) e.g. not prepared, sick, done by replacement, issues of mastery of some aspects of content

**Site Case Manager signature:** \_\_\_\_\_
