# Supplementary material for: Behaviour-change intervention in a multicentre, randomised, placebo-controlled COPD study: methodological considerations and implementation
Source: PubMed Central journal article supplement — BMJ Open. 2016 Apr 4;6(4):e010109. doi: 10.1136/bmjopen-2015-010109 (PMC4823464; doi:10.1136/bmjopen-2015-010109), 2016-04-04
Supplement: bmjopen-2015-010109supp_appendix3.pdf [file bmjopen-2015-010109supp_appendix3.pdf]

**DATA EXTRACTION SHEET FOR THE COUNTRY CASE MANAGER  
PROGRAM DELIVERY ASSESSMENT OF INDIVIDUAL PRE-SESSION**

| <b>Site Case Manager ID:</b>                                                                                                                                                                                                                                                                                                                    |                          | <b>Session Date:</b>                    |            |        |               |               |
|-------------------------------------------------------------------------------------------------------------------------------------------------------------------------------------------------------------------------------------------------------------------------------------------------------------------------------------------------|--------------------------|-----------------------------------------|------------|--------|---------------|---------------|
| <b>Audiofile ID:</b>                                                                                                                                                                                                                                                                                                                            |                          | <b>Date received from Study Coord.:</b> |            |        |               |               |
| <b>Number of patients:</b>                                                                                                                                                                                                                                                                                                                      |                          | <b>Date evaluated:</b>                  |            |        |               |               |
| Topics to be covered                                                                                                                                                                                                                                                                                                                            | Covered                  |                                         | Asking (1) |        | Listening (2) | Informing (3) |
|                                                                                                                                                                                                                                                                                                                                                 | yes                      | no                                      | Open       | Closed |               |               |
| 1. Identify current level of autonomy, physical activity and functional limitations                                                                                                                                                                                                                                                             | <input type="checkbox"/> | <input type="checkbox"/>                |            |        |               |               |
| 2. Complete with the patient the following questionnaires:<br>2.1. Physical Activity Outcome Expectancies<br>2.2. Perceived competence Scale (PCS) for physical activity<br>2.3. Treatment self-regulation questionnaire (TSRQ) for Physical Activity                                                                                           | <input type="checkbox"/> | <input type="checkbox"/>                |            |        |               |               |
| 3. Using the Visual Analogue Scale, determine patient's stage of change with respect to engaging in Physical Activity                                                                                                                                                                                                                           | <input type="checkbox"/> | <input type="checkbox"/>                |            |        |               |               |
| 4. Determine patient's level of motivation or reasons for engaging in Physical Activity (10-point scale).<br>4.1. Help the patient to determine his ultimate goal in terms of Physical Activity<br>4.2. Determine patient's level of self-efficacy in regard to beginning OR maintaining (depending on their stage of change) Physical Activity | <input type="checkbox"/> | <input type="checkbox"/>                |            |        |               |               |
| 5. Identify perceived barriers according to patient's self-evaluation. Find solutions together.                                                                                                                                                                                                                                                 | <input type="checkbox"/> | <input type="checkbox"/>                |            |        |               |               |
| 6.1. Teach or review the proper use of the pedometer. Ask patient to explain, in his own words, how he plans to use the pedometer (goal in steps per day, progression).<br>6.2. Give constructive feedback and reinforcement on the use of the pedometer. Find solutions together.                                                              | <input type="checkbox"/> | <input type="checkbox"/>                |            |        |               |               |
| <b>Country Site Manager ID:</b> _____ <b>Signature:</b> _____<br><b>Session was covered interactively:</b> <input type="checkbox"/> yes <input type="checkbox"/> no <input type="checkbox"/> partially<br><b>Comments:</b><br><b>Plan:</b><br><b>Feedback given to Site Case Manager (SCM):</b> <input type="checkbox"/> Describe:              |                          |                                         |            |        |               |               |
| <b>Comments from the Global Behaviour Modification team, Date:</b> _____ <b>or</b> <input type="checkbox"/> N/A (not selected for feedback)<br><input type="checkbox"/> Highly Satisfactory <input type="checkbox"/> Satisfactory (see comments) <input type="checkbox"/> Needs improvement (see comments)                                      |                          |                                         |            |        |               |               |

(1) **Asking:** Count number of times the Site Case Manager (SCM) used open questions and closed questions.  
 (2) **Listening:** Count number of times the SCM used reflections (reflective listening) to express empathy.  
 (3) **Informing:** Count number of times the SCM asked permission to patient(s) to give them information and asked for their feedback.
